# Supplementary material
Source: PubMed Central journal article supplement (PMC1325006)

**A**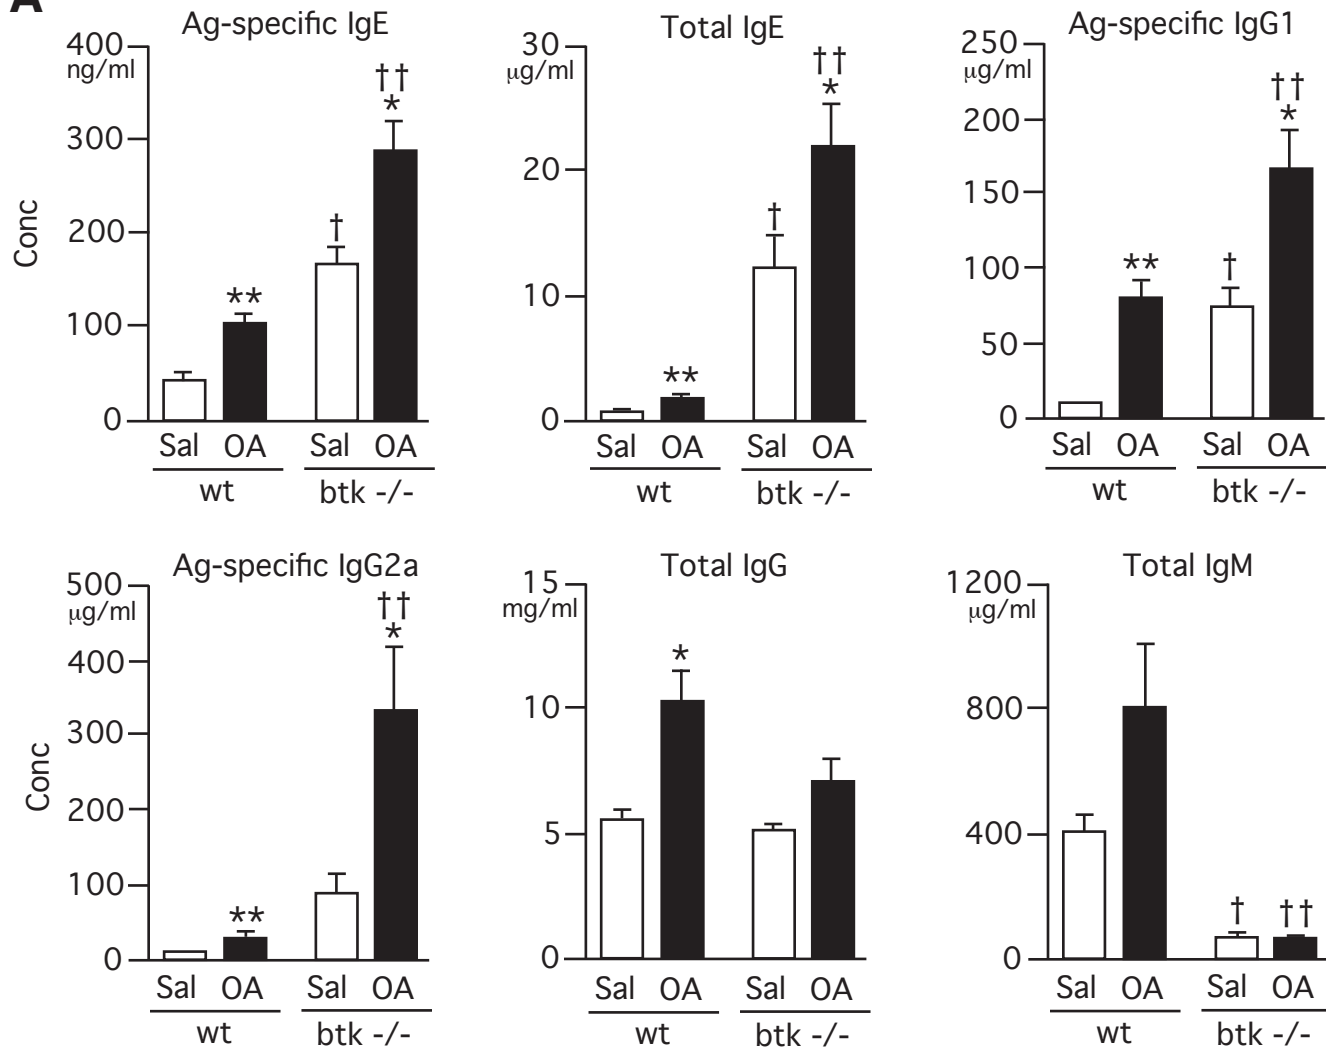

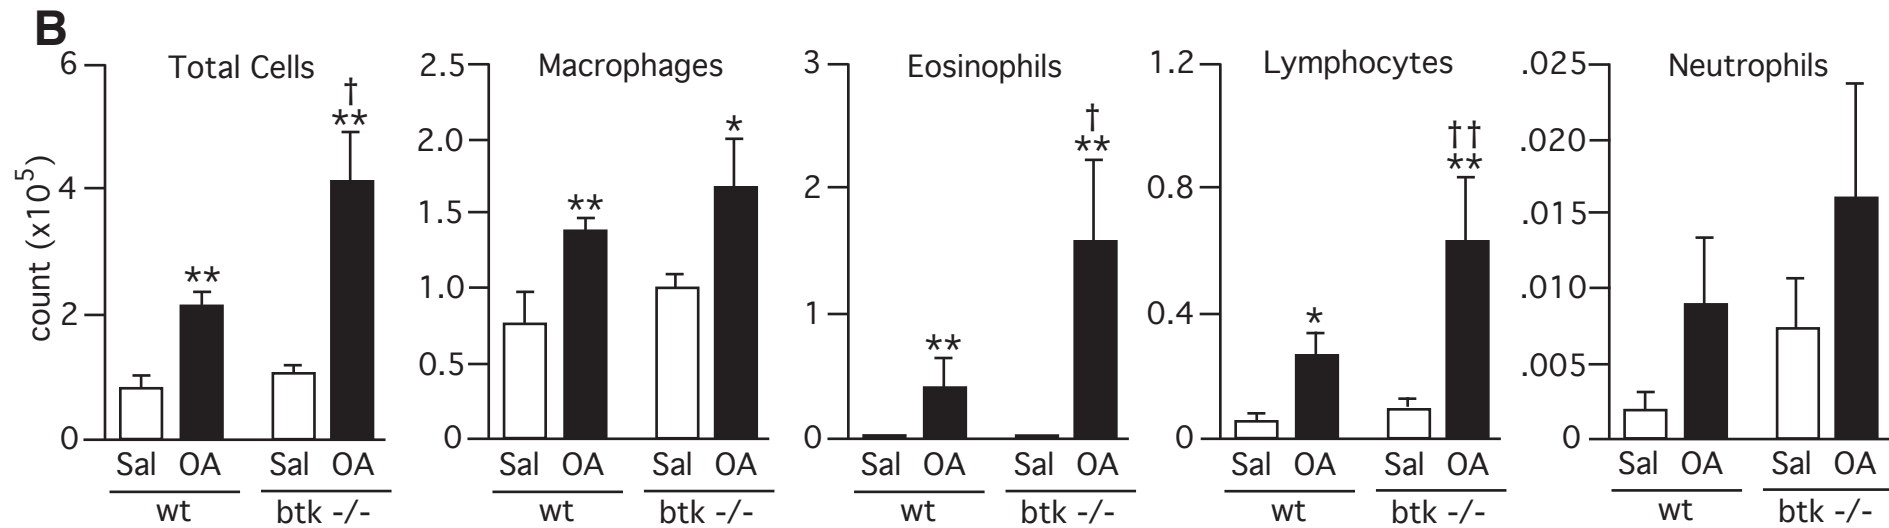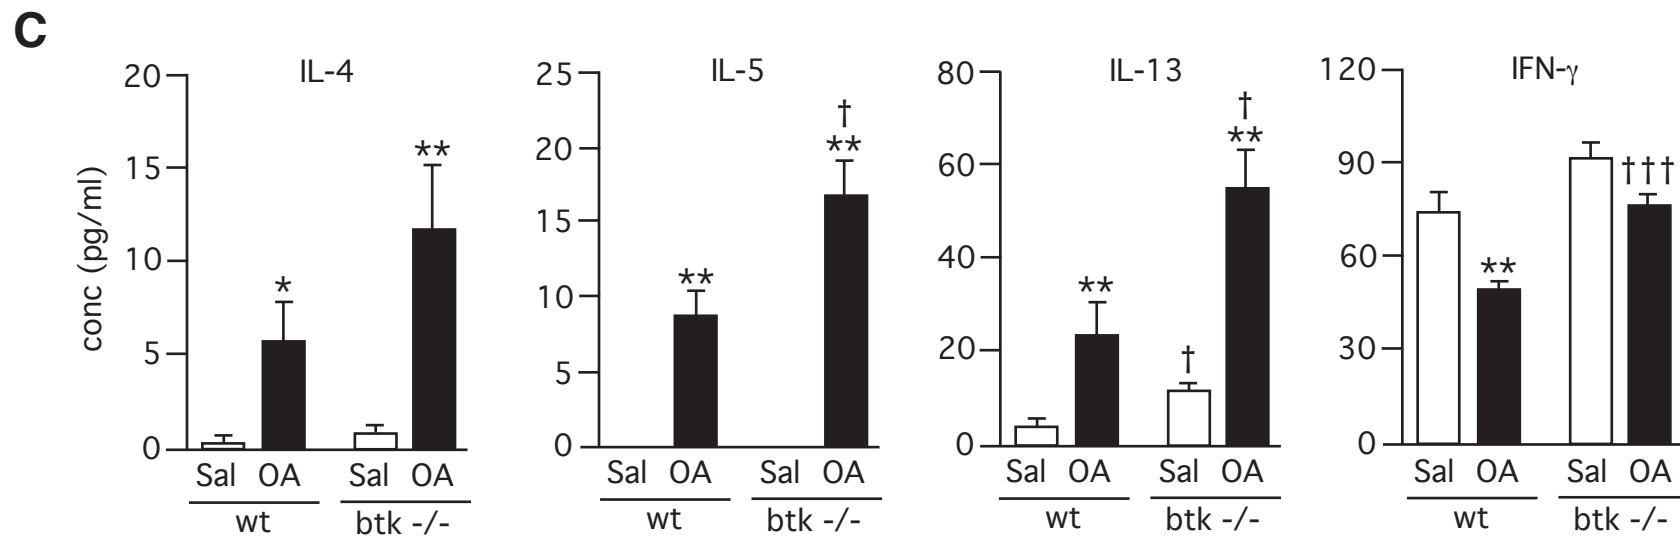

Supplement: pnas_0509784103_1.pdf [file pnas_0509784103_1.pdf]

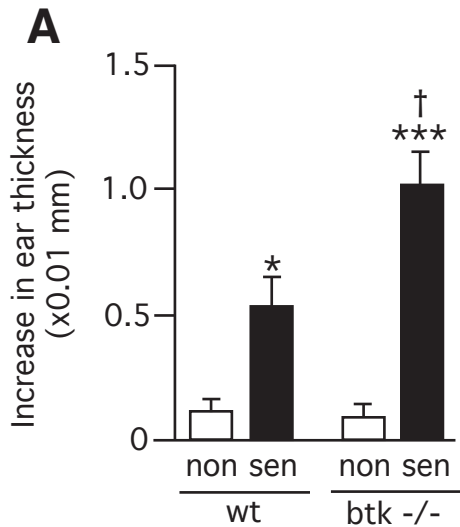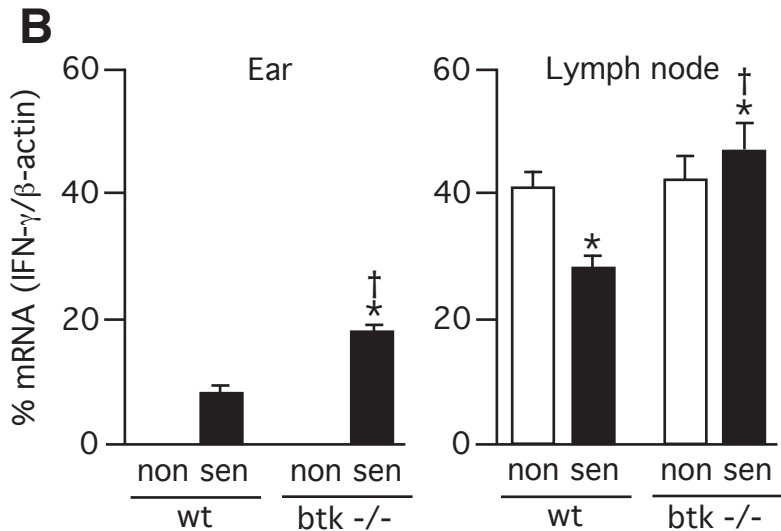

Supplement: pnas_0509784103_2.pdf [file pnas_0509784103_2.pdf]

**A**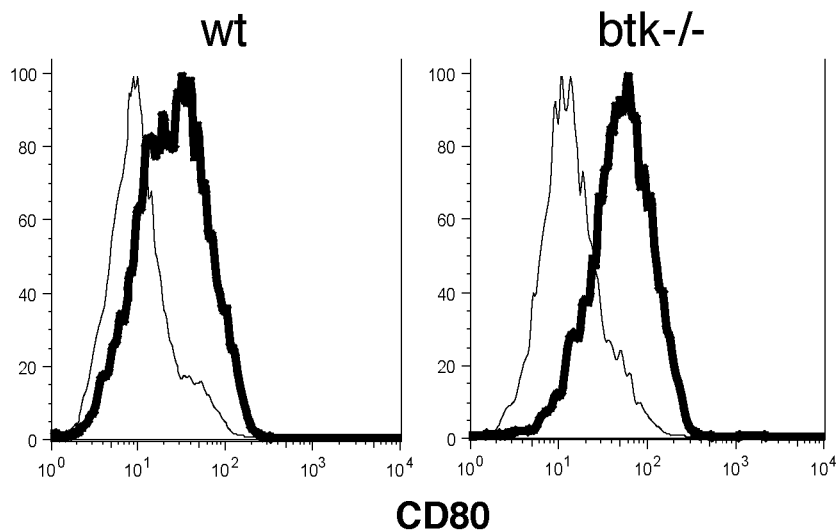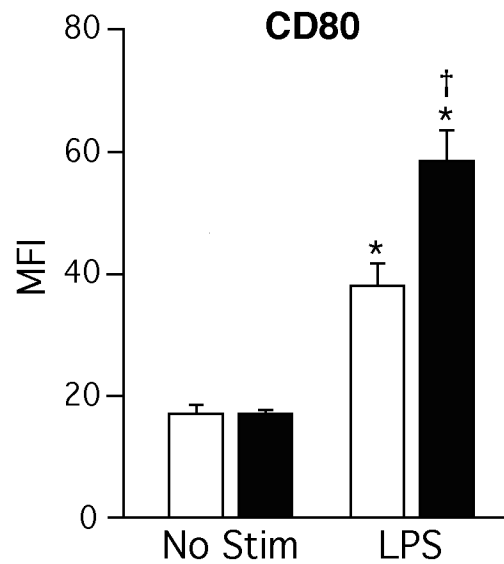**B**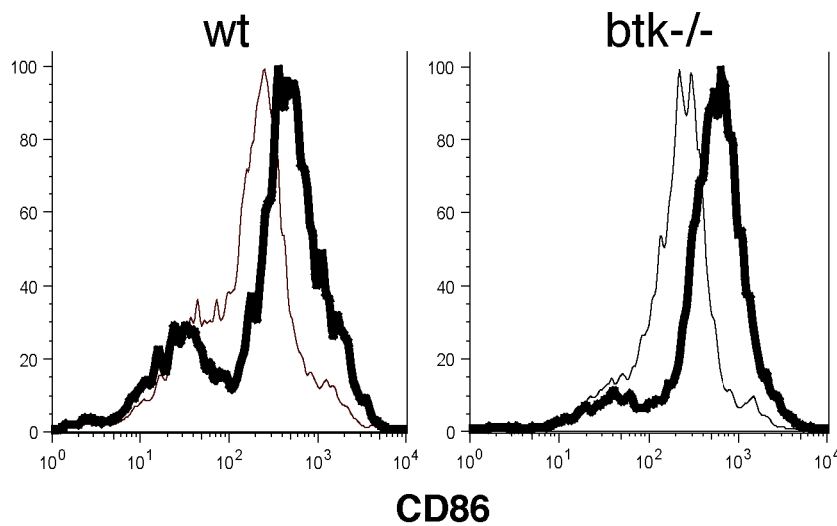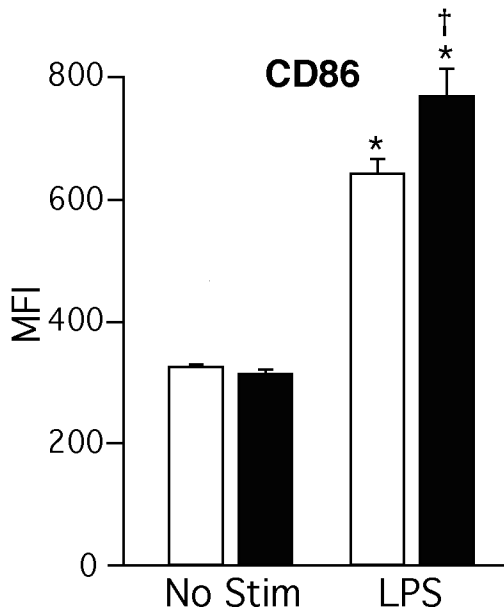

Supplement: pnas_0509784103_3.pdf [file pnas_0509784103_3.pdf]

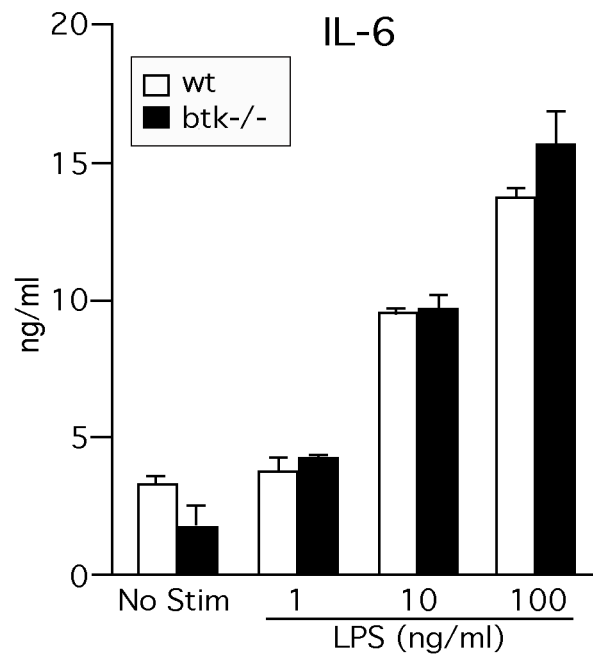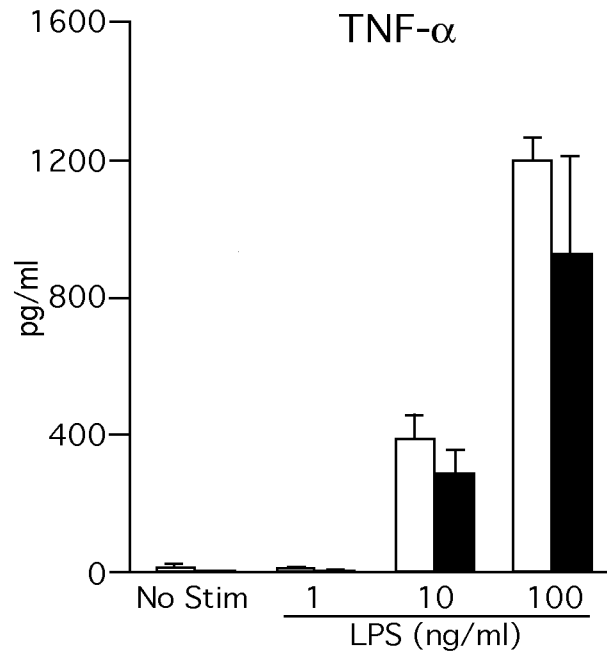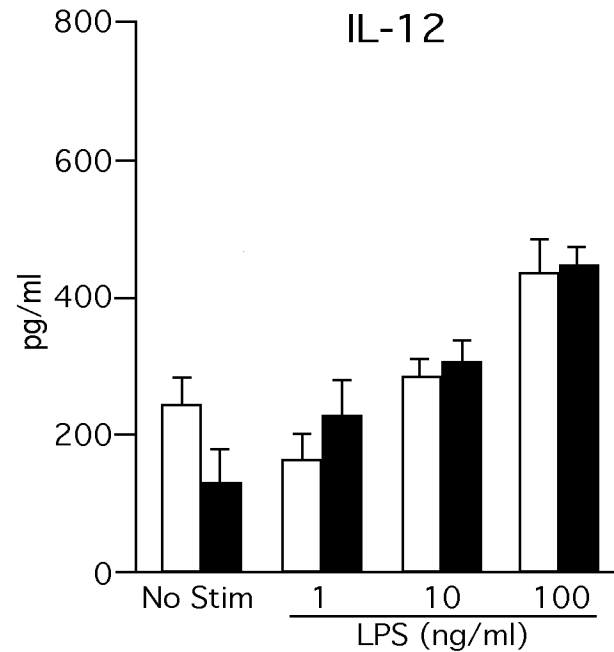

Supplement: pnas_0509784103_4.pdf [file pnas_0509784103_4.pdf]

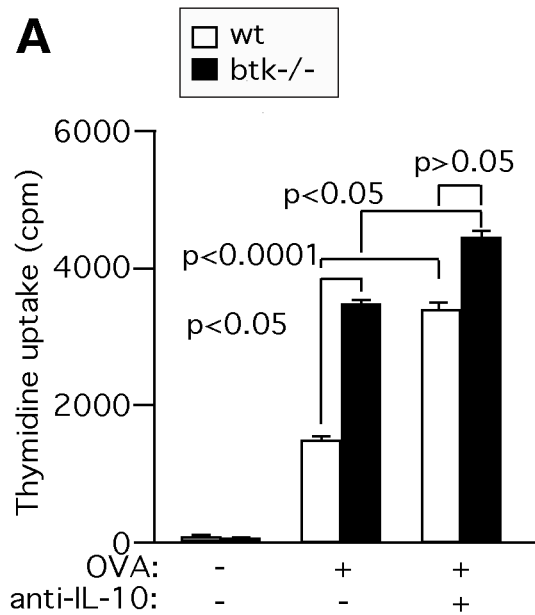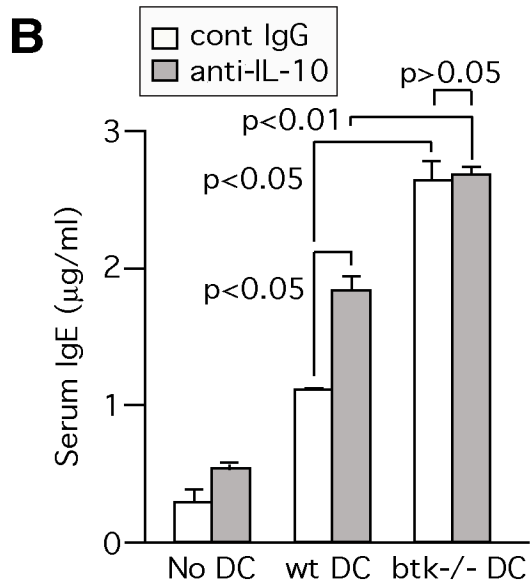

Supplement: pnas_0509784103_5.pdf [file pnas_0509784103_5.pdf]
